# Supplementary material
Source: Royal Society of Chemistry journal article supplement (doi:10.1039/d6ta03119f)
Supplement: d6ta03119f1.pdf [file d6ta03119f1.pdf]

## Supporting information to:

### Ammonia decomposition on $\text{LaV}(\text{O,N})_{3-\delta}$ surfaces: toward a mechanistic understanding

Kehan Huang,<sup>a†</sup> Samia Al Sobhi,<sup>b†</sup> Zonghao Shen,<sup>a</sup> Zhenzhu Li,<sup>a</sup> Alex Walton,<sup>c</sup> Norton West,<sup>c</sup> George Wilson,<sup>b</sup> Jingdong Xu,<sup>b</sup> and Stephen J. Skinner<sup>a, b, d\*</sup>

† These authors contributed equally to this work.

\* The corresponding author

<sup>a</sup> *Imperial Global Singapore (IGS), 1 CREATE Way, #11-01, CREATE Tower, Singapore 138602, Singapore.*

<sup>b</sup> *Department of Materials, Imperial College London, South Kensington, London SW7 2AZ, UK.*

<sup>c</sup> *Department of Chemistry and Photon Science Institute, The University of Manchester, Manchester M13 9PL, UK.*

<sup>d</sup> *International Institute for Carbon Neutral Energy Research, Kyushu University, Fukuoka 819-0395, Japan.*

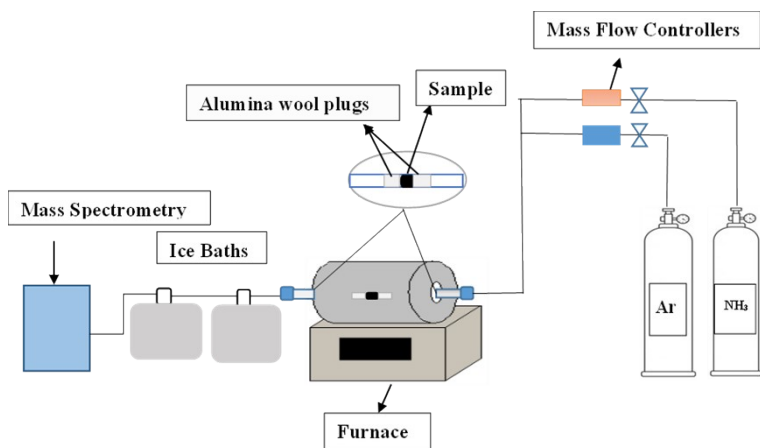

Figure S1 Experimental setup for ammonia decomposition reaction.

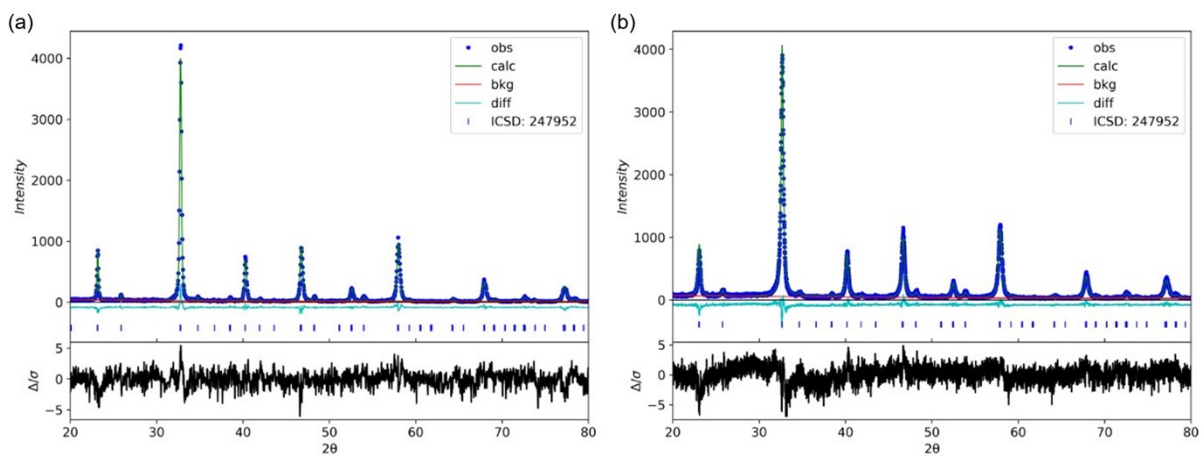

Figure S2 Rietveld refinement plot of (a) LaVON-S and (b) LaVON-P, respectively.

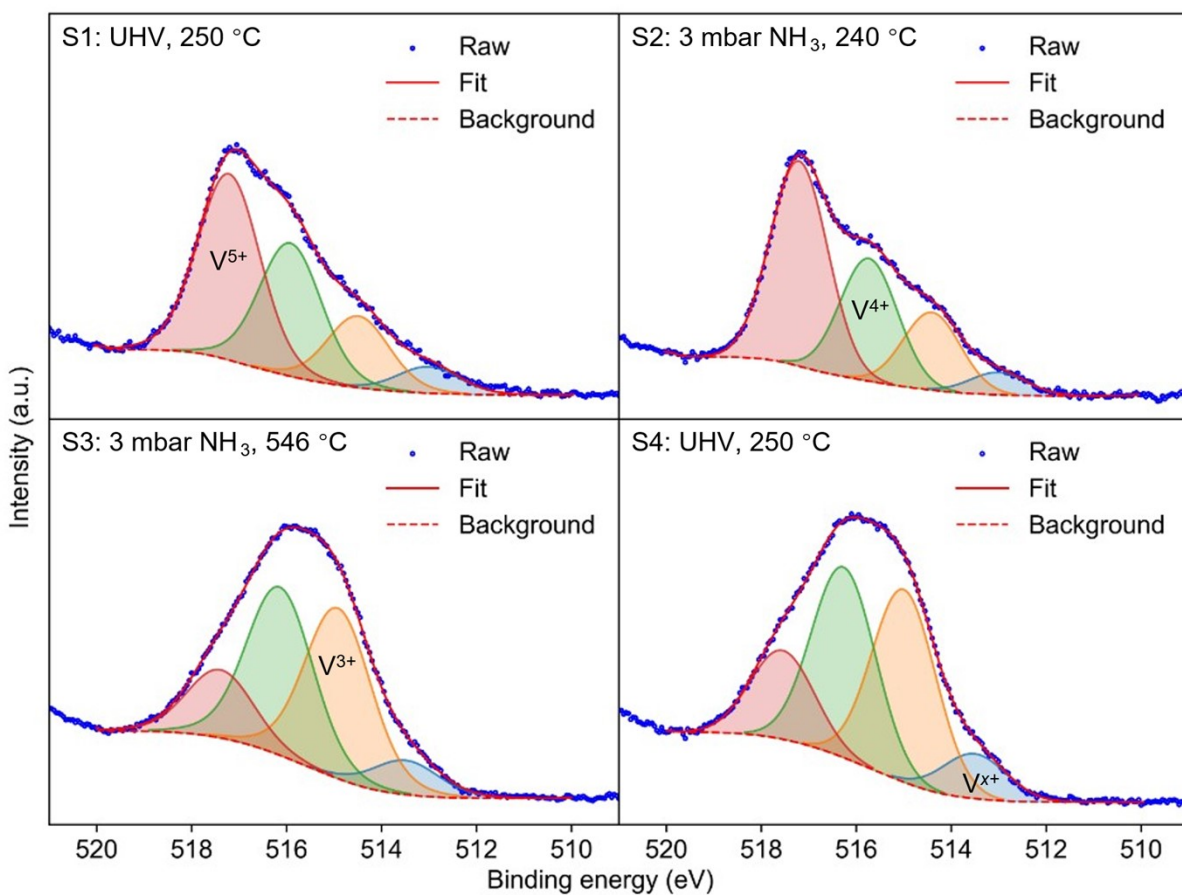

Figure S3 Deconvolution of the NAP-XPS spectra of V  $2p_{3/2}$ .  $V^{x+}$  represented the V cations with lower oxidation states ( $0 < x < 3$ ).

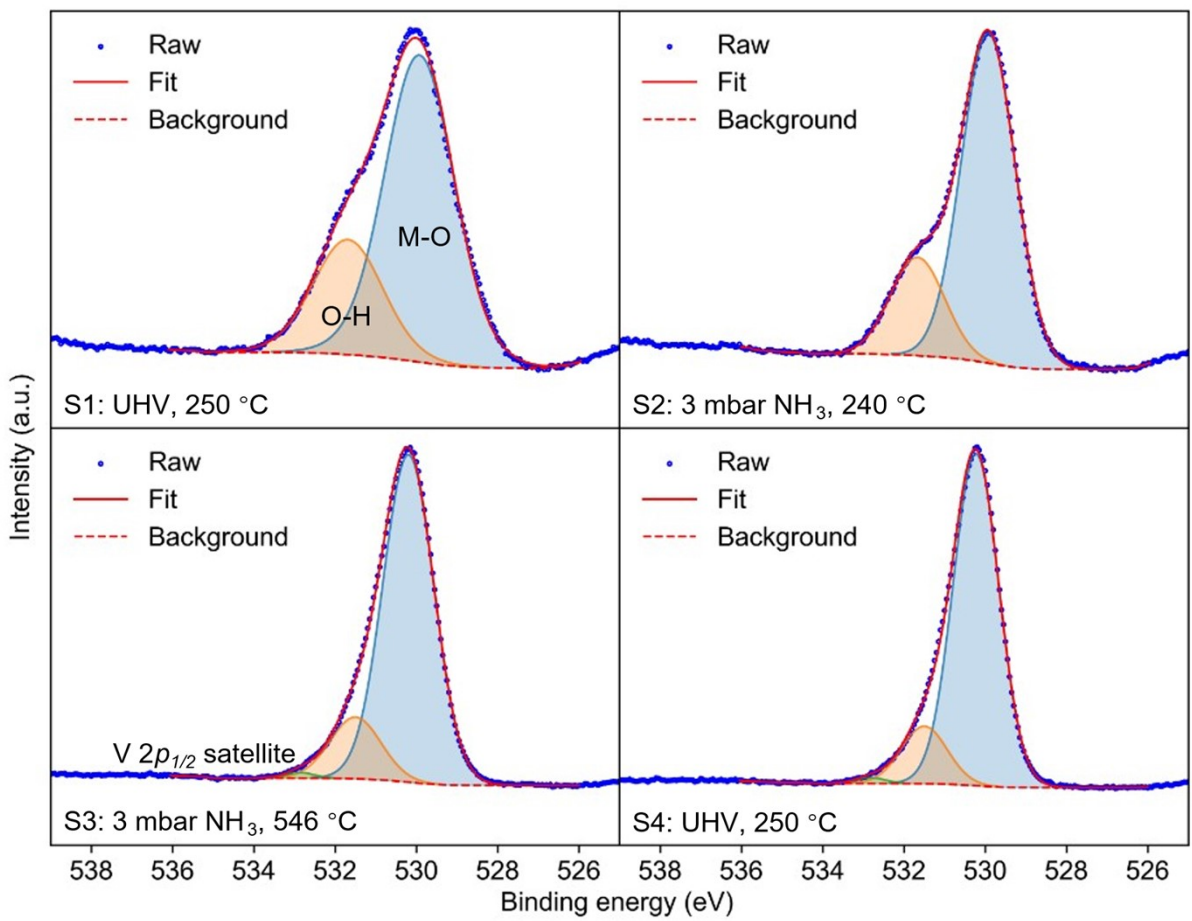

Figure S4 Deconvolution of the NAP-XPS spectra of O 1s.

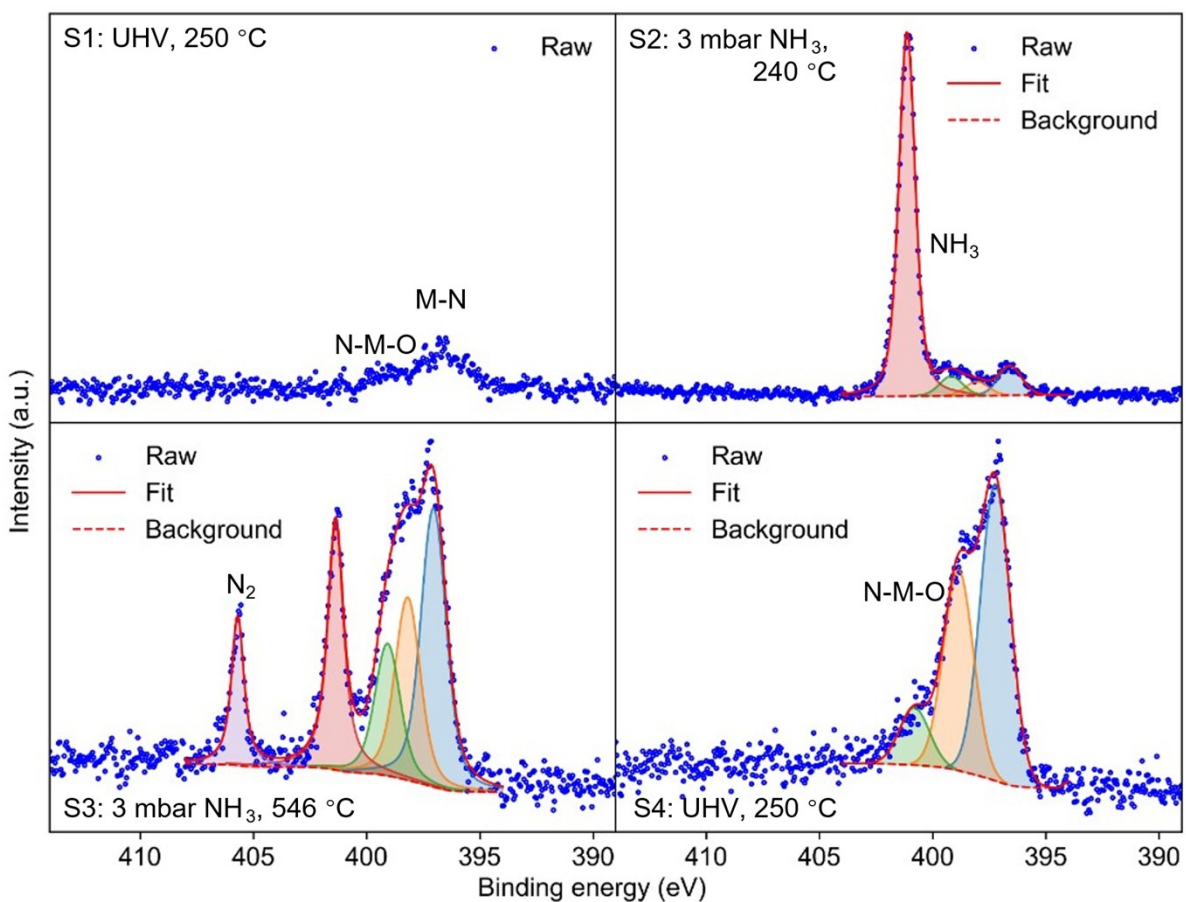

Figure S5 Deconvolution of the NAP-XPS spectra of N 1s. The fitting of S1: UHV, 250 °C is absent due to the low signal intensity and composition ambiguity.

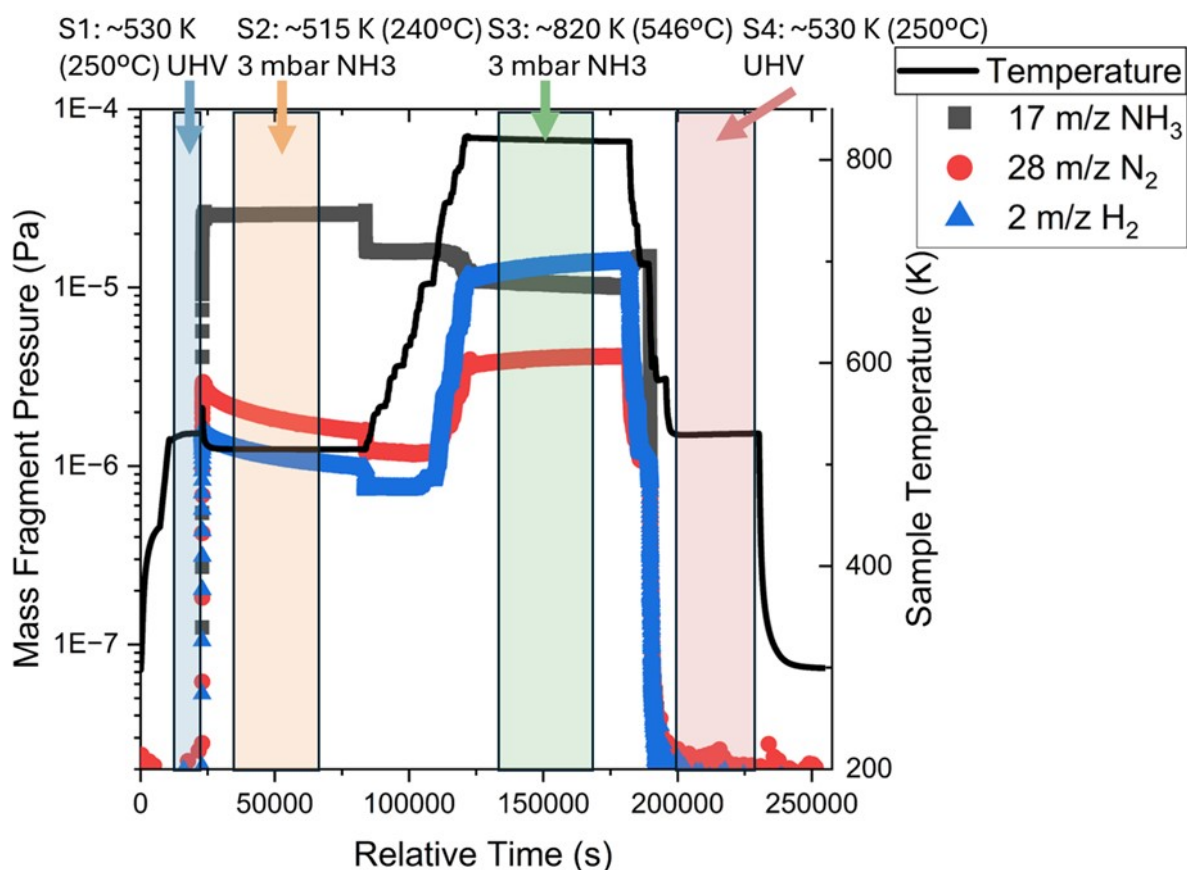

Figure S6 NAP-XPS instrument trace, correlating mass fragments of ammonia to products, with temperature recorded on the sample plate. Transparent boxes indicating approximate timing of when XPS measurements were taken with their corresponding conditions.

Table S1 The energy along the reaction path for ammonia decomposition on different surfaces. The reference energy ( $\Delta E = 0$  eV) refers to an isolated NH<sub>3</sub> molecule and naked surfaces.

| $\Delta E$ (eV)         | *+NH <sub>3</sub> (g) | NH <sub>3</sub> * | NH <sub>2</sub> *+H* | NH*+2H* | N*+3H* | *+0.5N <sub>2</sub> (g)+1.5H <sub>2</sub> (g) |
|-------------------------|-----------------------|-------------------|----------------------|---------|--------|-----------------------------------------------|
| LaVO <sub>3</sub>       | 0                     | -0.92             | -1.64                | 0.05    | 1.77   | 1.09                                          |
| LaV(O,N) <sub>3.5</sub> | 0                     | -0.86             | -2.24                | -3.32   | -2.62  | 1.09                                          |
| LaVON <sub>2</sub>      | 0                     | -0.93             | -1.87                | -0.91   | -0.29  | 1.09                                          |

Table S2 Deconvolution model of the V 2p and O 1s spectra. FWHM is short for full width half maximum.

|                                     | S1: UHV, 250 °C                     |           |                  | S2: 3 mbar NH <sub>3</sub> , 240 °C |           |                  |
|-------------------------------------|-------------------------------------|-----------|------------------|-------------------------------------|-----------|------------------|
|                                     | Binding energy (eV)                 | FWHM (eV) | Atomic ratio (%) | Binding energy (eV)                 | FWHM (eV) | Atomic ratio (%) |
| V 2p <sub>3/2</sub> V <sup>5+</sup> | 517.2                               |           | 44.7             | 517.2                               |           | 48.4             |
| V 2p <sub>3/2</sub> V <sup>4+</sup> | 515.9                               | 1.6       | 31.9             | 515.7                               | 1.4       | 28.4             |
| V 2p <sub>3/2</sub> V <sup>3+</sup> | 514.5                               |           | 17.1             | 514.4                               |           | 18.0             |
| V 2p <sub>3/2</sub> V <sup>x+</sup> | 513.0                               |           | 6.3              | 513.0                               |           | 5.2              |
| O 1s MO                             | 529.9                               | 2.0       |                  | 529.9                               | 1.6       |                  |
| O 1s -OH                            | 531.7                               |           |                  | 531.7                               |           |                  |
|                                     | S3: 3 mbar NH <sub>3</sub> , 546 °C |           |                  | S4: UHV, 250 °C                     |           |                  |
|                                     | Binding energy (eV)                 | FWHM (eV) | Atomic ratio (%) | Binding energy (eV)                 | FWHM (eV) | Atomic ratio (%) |
| V 2p <sub>3/2</sub> V <sup>5+</sup> | 517.4                               |           | 15.5             | 517.6                               |           | 17.2             |
| V 2p <sub>3/2</sub> V <sup>4+</sup> | 516.1                               | 1.7       | 38.1             | 516.3                               | 1.6       | 36.9             |
| V 2p <sub>3/2</sub> V <sup>3+</sup> | 514.9                               |           | 38.6             | 515.0                               |           | 37.2             |
| V 2p <sub>3/2</sub> V <sup>x+</sup> | 513.5                               |           | 7.8              | 513.5                               |           | 8.7              |
| O 1s MO                             | 530.2                               | 1.5       |                  | 530.2                               | 1.3       |                  |
| O 1s -OH                            | 531.5                               |           |                  | 531.5                               |           |                  |
| V 2p Satellite                      | 532.7                               | 0.8       |                  | 532.8                               | 0.9       |                  |

Table S3 Deconvolution model of the N 1s spectra. FWHM is short for full width half maximum. The peak fits presented only represent the best possible fits with least components and may not attribute to the actual compositions.

|                  | S1: UHV, 250 °C                     |           | S2: 3 mbar NH <sub>3</sub> , 240 °C |           |
|------------------|-------------------------------------|-----------|-------------------------------------|-----------|
|                  | Binding energy (eV)                 | FWHM (eV) | Binding energy (eV)                 | FWHM (eV) |
| M-N              |                                     |           | 396.6                               |           |
| N-M-O (1)        |                                     |           | 398.0                               | 1.2       |
| N-M-O (2)        |                                     |           | 399.2                               |           |
| -NH <sub>3</sub> |                                     |           | 401.1                               | 0.9       |
|                  | S3: 3 mbar NH <sub>3</sub> , 546 °C |           | S4: UHV, 250 °C                     |           |
|                  | Binding energy (eV)                 | FWHM (eV) | Binding energy (eV)                 | FWHM (eV) |
| M-N              | 397.0                               |           | 397.2                               |           |
| N-M-O (1)        | 398.2                               | 1.3       | 398.9                               | 1.6       |
| N-M-O (2)        | 399.1                               |           | 400.8                               |           |
| -NH <sub>3</sub> | 401.4                               | 0.9       |                                     |           |
| -N <sub>2</sub>  | 405.7                               | 0.7       |                                     |           |
